# Supplementary material for: Interferon Regulatory Factor 4 controls TH1 cell effector function and metabolism
Source: PubMed Central journal article supplement (PMC5071867; doi:10.1038/srep35521), 2016-10-20
Supplement: srep35521-s1.pdf [file srep35521-s1.pdf]

## Supplementary File

### Interferon Regulatory Factor 4 controls T<sub>H1</sub> cell effector function and metabolism

**Justus Mahnke<sup>1</sup>, Valéa Schumacher<sup>1</sup>, Stefanie Ahrens<sup>1</sup>, Nadja Käding<sup>2</sup>, Lea Marie Feldhoff<sup>2</sup>, Magda Huber<sup>3</sup>, Jan Rupp<sup>2</sup>, Friederike Raczowski<sup>1#</sup>, Hans-Willi Mittrücker<sup>1#\*</sup>**

1) Institute of Immunology, University Medical Center Hamburg-Eppendorf, Hamburg, Germany

2) Department of Molecular and Clinical Infectious Diseases, University of Lübeck, Lübeck, Germany

3) Institute for Medical Microbiology and Hospital Hygiene, University of Marburg, Marburg, Germany

## Supplementary Figures

### Figure S1

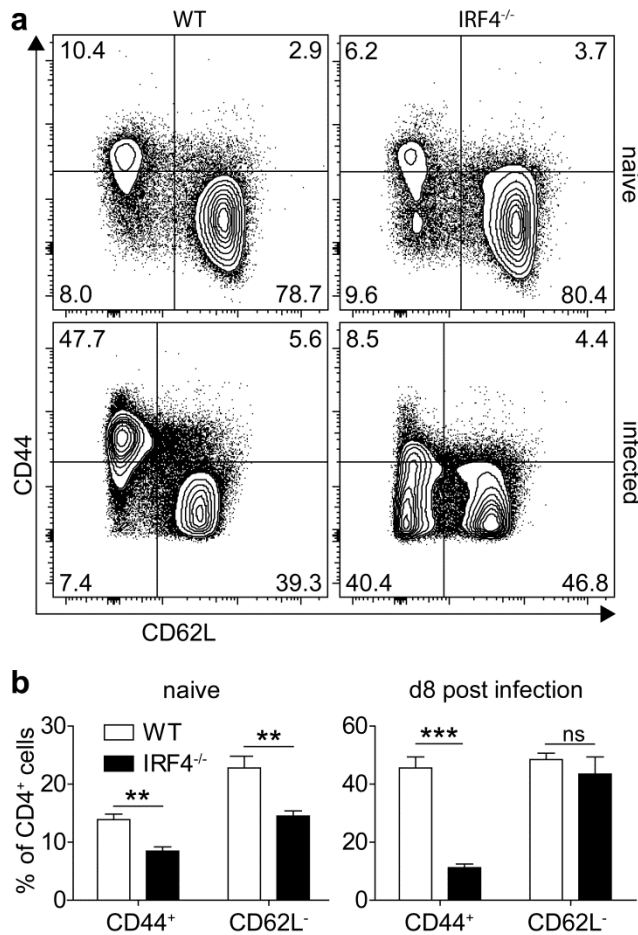

### **IRF4<sup>-/-</sup> mice show impaired CD4<sup>+</sup> T cell response to infection with *L. monocytogenes*.**

WT and IRF4<sup>-/-</sup> mice were i.v. infected with  $5 \times 10^4$  LmOVA. Eight days post infection, CD4<sup>+</sup> T cells from spleen were analyzed for CD44 and CD62L expression. (A) Representative dot plots for CD4-gated cells from naive and infected mice. (B) CD44 and CD62L expression of CD4<sup>+</sup> T cells from naive and infected mice. Bars represent mean  $\pm$  SEM from 4 individually analyzed mice per group. The result is representative for 2 independent experiments.

**Figure S2**

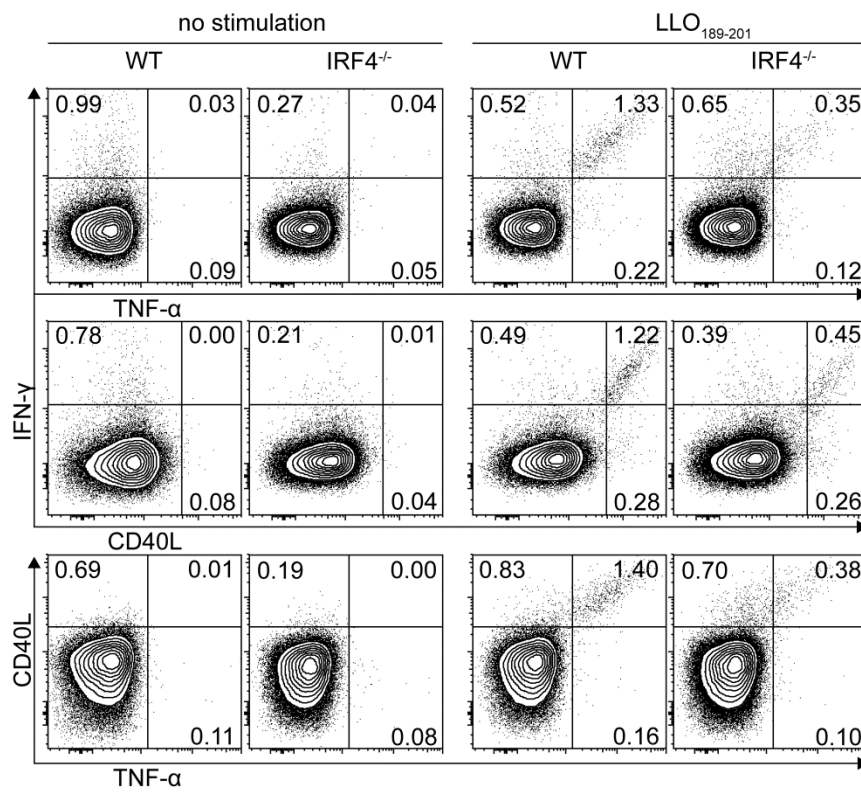

**IRF4<sup>-/-</sup> mice fail to mount a T<sub>H1</sub> response against *L. monocytogenes*.**

WT and IRF4<sup>-/-</sup> mice were i.v. infected with  $5 \times 10^4$  *L. monocytogenes*. Eight days post infection, spleen cells were stimulated for 4h with  $10^{-5}$ M LLO<sub>189-201</sub> or were incubated without stimulation. Intracellular expression of IFN- $\gamma$ , TNF- $\alpha$  and CD40L was determined by flow cytometry. Dot blots show results for CD4-gated cells of infected WT and IRF4<sup>-/-</sup> mice. Results are representative for 4 individually analyzed mice per group and 2 independent experiments.

**Figure S3**

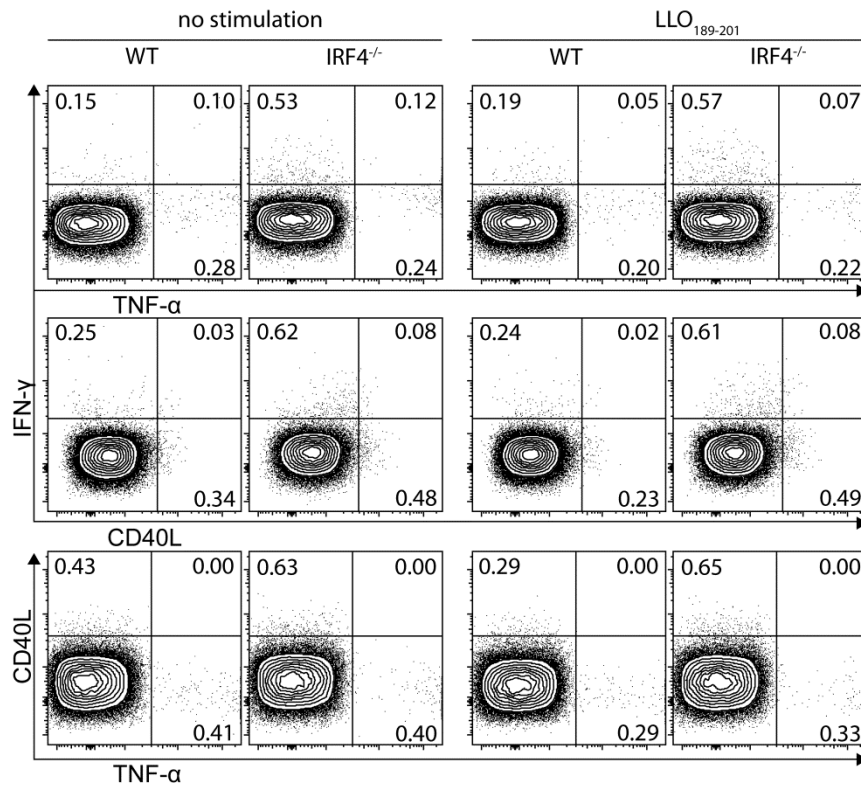

**Control stimulation of spleen cells from naive WT and IRF4<sup>-/-</sup> mice.**

Spleen cells from WT and IRF4<sup>-/-</sup> mice were stimulated for 4h with 10<sup>-5</sup>M LLO<sub>189-201</sub> or were incubated without stimulation. Intracellular expression of IFN- $\gamma$ , TNF- $\alpha$  and CD40L was determined by flow cytometry. Dot blots show results for CD4-gated cells of naive WT and IRF4<sup>-/-</sup> mice. Results are representative for 4 individually analyzed mice per group in one experiment.

**Figure S4**

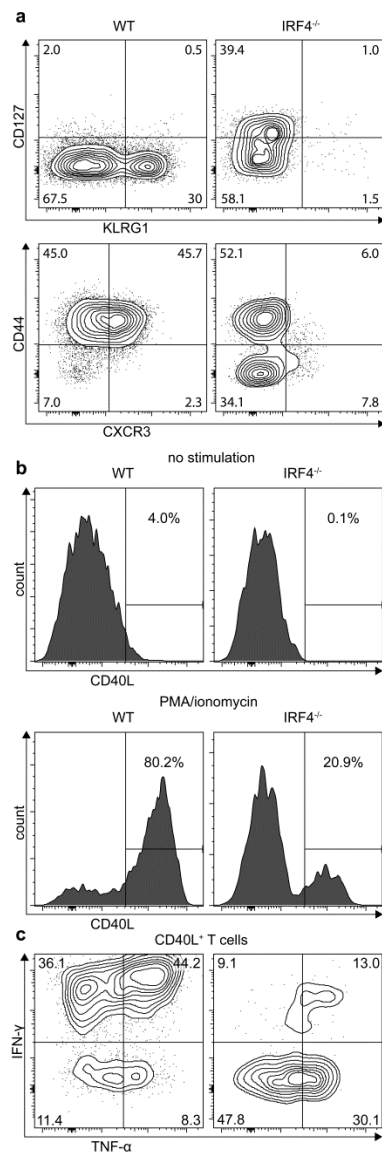

**Impaired T<sub>H1</sub> differentiation of IRF4<sup>-/-</sup> CD4<sup>+</sup> T cells.**

Purified CD4<sup>+</sup> T cells from CD90.1<sup>+</sup>CD90.2<sup>-</sup> WT and CD90.1<sup>-</sup>CD90.2<sup>+</sup> IRF4<sup>-/-</sup> mice were mixed in a 1:1 ratio and 2×10<sup>6</sup> cells were i.v. transferred into RAG1<sup>-/-</sup> mice, which had been infected with 10<sup>5</sup> Lm 4h earlier. Eight days post infection, spleen cells of mice were analyzed. (A) Representative expression profile for CD127, KLRG1, CD44 and CXCR3 for CD90.1<sup>+</sup>CD90.2<sup>-</sup> WT CD4<sup>+</sup> T cells and CD90.1<sup>-</sup>CD90.2<sup>+</sup> IRF4<sup>-/-</sup> CD4<sup>+</sup> T cells. (B, C) Spleen cells from infected recipients were incubated for 4h with PMA/ionomycin or without stimulation and stained intracellularly for CD40L, TNF-α, and IFN-γ. (B) CD40L expression in CD4<sup>+</sup> T cells. (C) IFN-γ and TNF-α expression in CD40L<sup>+</sup> cells from stimulated WT and IRF4<sup>-/-</sup> CD4<sup>+</sup> T cells. Representative results are shown.

**Figure S5**

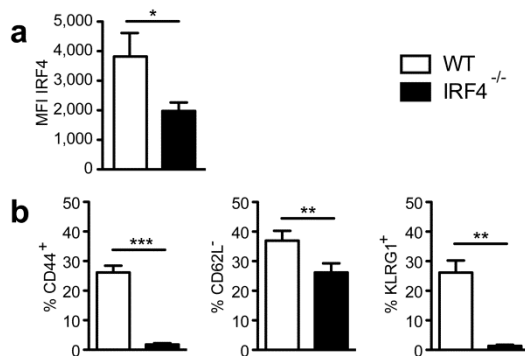

**Impaired response of IRF4<sup>-/-</sup> OT-II cells.**

Purified CD4<sup>+</sup> T cells from WT CD90.1<sup>+</sup>CD90.2<sup>+</sup> or IRF4<sup>-/-</sup> CD90.1<sup>-</sup>CD90.2<sup>+</sup> OT-II mice were mixed at a 1:1 ratio and  $3 \times 10^6$  cells were i.v. transferred into CD90.1<sup>+</sup>CD90.2<sup>-</sup> WT mice. Recipient mice had been i.v. infected with  $10^5$  LmOVA one day before. Spleen cells were analyzed 4d post transfer by extra- and intracellular mAb staining and flow cytometry. (A) IRF4 expression in WT and IRF4<sup>-/-</sup> OT-II cells. (B) Surface expression of CD44, CD62L and KLRG1 on WT and IRF4<sup>-/-</sup> OT-II cells. Bars give the mean  $\pm$  SEM of 6 individually analyzed mice. Results are representative for 4 experiments.

**Figure S6**

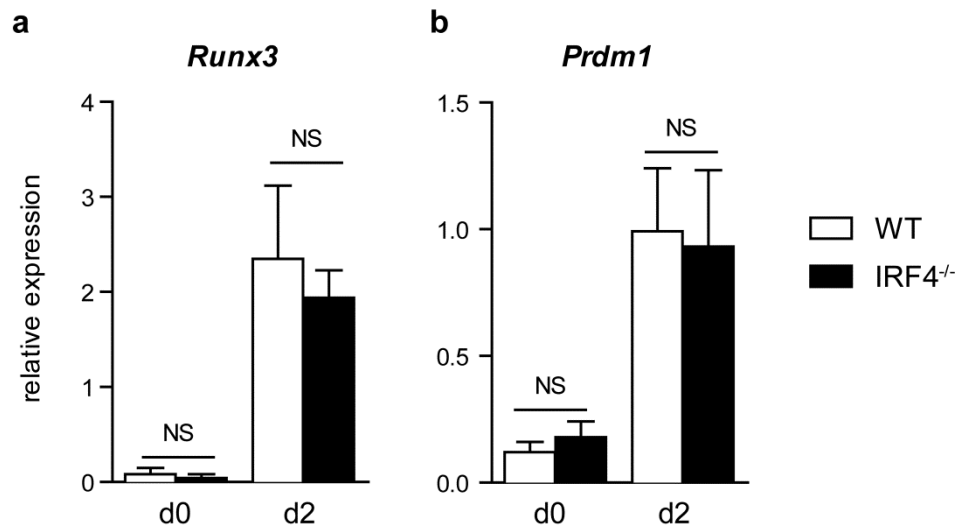

**Expression of *Runx3* and *Prdm1* in activated WT and IRF4<sup>-/-</sup> CD4<sup>+</sup> T cells.**

CD4<sup>+</sup> T cells were purified and stimulated in individual cultures for 2d as described in Figure 5. Expression of *Runx3* and *Prdm1* was measured by RT PCR. Bars represent the mean ± SEM of 4 individual samples from 2 independent experiments.

**Figure S7**

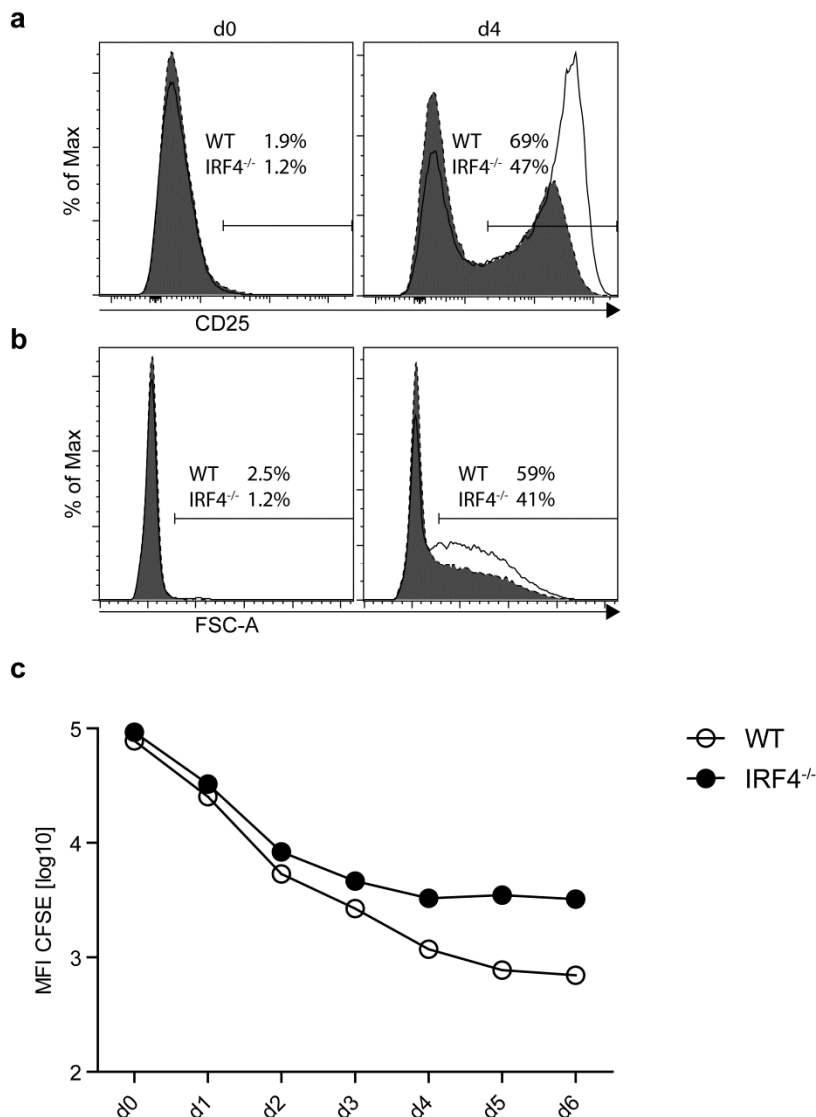

**Phenotype and proliferation of activated WT and IRF4<sup>-/-</sup> CD4 T cells**

CD4<sup>+</sup> T cells from WT (CD90.1<sup>+</sup>) and IRF4<sup>-/-</sup> mice (CD90.2<sup>+</sup>) were mixed with a 1:1 ratio and stimulated *in vitro* with anti-CD3 mAb, anti-CD28 mAb and IL-2 in the presence of IL-12 and anti-IL-4 mAb. (A) CD25 expression and (B) size (FSC-A) of WT and IRF4<sup>-/-</sup> CD4<sup>+</sup> T cells at d0 and d4 of stimulation. Histograms in (A) and (B) show representative results for CD4-gated cells. (C) CD4<sup>+</sup> T cells from WT and IRF4<sup>-/-</sup> mice were CFSE labelled and stimulated *in vitro* with anti-CD3 mAb, anti-CD28 mAb and IL-2 in the presence of IL-12 and anti-IL-4 mAb. CFSE staining intensity of viable cells was determined at the indicated days. Results are representative for 3 independent experiments (A, B) or one experiment (C).



**Figure S8**

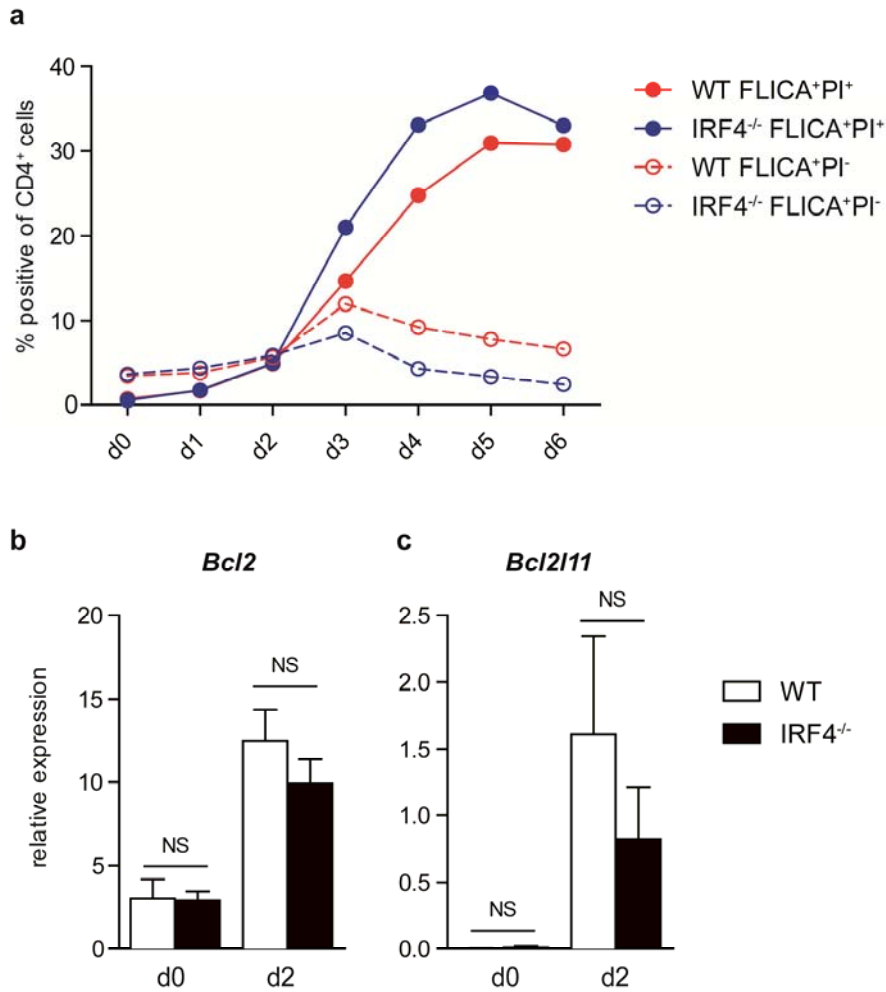

### Apoptosis of WT and IRF4<sup>-/-</sup> CD4 T cells

CD4<sup>+</sup> T cells from WT and IRF4<sup>-/-</sup> mice were stimulated in individual cultures with immobilized anti-CD3 mAb, soluble anti-CD28 mAb, IL-2 and IL-12. Frequencies of early (FLICA<sup>+</sup>PI<sup>-</sup>) and late apoptotic (FLICA<sup>+</sup>PI<sup>+</sup>) CD4<sup>+</sup> T cells were determined at indicated days of culture. (B) Expression of *Bcl2* and *Bcl2l11* was measured by RT PCR. Result in (A) is representative for 2 independent experiments. Bars in (B) represent the mean  $\pm$  SEM of 4 individual samples from 2 independent experiments.
